# Supplementary material for: The COVID-19 pandemic masks the way people perceive faces
Source: Springer Nature journal article supplement (doi:10.1038/s41598-020-78986-9), 2020-12-21
Supplement: 41598_2020_78986_MOESM1_ESM.pdf [file 41598_2020_78986_MOESM1_ESM.pdf]

## Supplementary Materials - The COVID-19 pandemic masks the way people perceive faces

Erez Freud, Andreja Stajduhar, R. Shayna Rosenbaum, Galia Avidan and Tzvi Ganel

### Repeated Measures ANOVA – Experiment 1

#### Within Subjects Effects

|                              | Sum of Squares | df  | Mean Square | F       | p      | $\eta^2_p$ |
|------------------------------|----------------|-----|-------------|---------|--------|------------|
| Orientation                  | 17272.539      | 1   | 17272.539   | 629.555 | < .001 | 0.685      |
| Orientation * group          | 1624.817       | 1   | 1624.817    | 59.222  | < .001 | 0.170      |
| Orientation * gender         | 95.187         | 1   | 95.187      | 3.469   | 0.064  | 0.012      |
| Orientation * group * gender | 0.999          | 1   | 0.999       | 0.036   | 0.849  | 0.000      |
| Residual                     | 7929.031       | 289 | 27.436      |         |        |            |

*Note.* Type III Sum of Squares

#### Between Subjects Effects

|                | Sum of Squares | df  | Mean Square | F      | p      | $\eta^2_p$ |
|----------------|----------------|-----|-------------|--------|--------|------------|
| group          | 4677.136       | 1   | 4677.136    | 46.686 | < .001 | 0.139      |
| gender         | 3257.044       | 1   | 3257.044    | 32.511 | < .001 | 0.101      |
| group * gender | 69.422         | 1   | 69.422      | 0.693  | 0.406  | 0.002      |
| Residual       | 28952.914      | 289 | 100.183     |        |        |            |

*Note.* Type III Sum of Squares

## Repeated Measures ANOVA – Experiment 1 – analysis by CFMT level

### Within Subjects Effects

|                                  | Sum of Squares      | df             | Mean Square         | F                     | p                   | $\eta^2_p$ |
|----------------------------------|---------------------|----------------|---------------------|-----------------------|---------------------|------------|
| Orientation                      | 8.440               | 1              | 8.440               | 621.461               | < .001              | 0.681      |
| Orientation * group              | 0.770               | 1              | 0.770               | 56.668                | < .001              | 0.163      |
| Residual                         | 3.952               | 291            | 0.014               |                       |                     |            |
| CFMT phase                       | 76.829 <sup>a</sup> | 3 <sup>a</sup> | 25.610 <sup>a</sup> | 1693.002 <sup>a</sup> | < .001 <sup>a</sup> | 0.853      |
| CFMT phase * group               | 0.617 <sup>a</sup>  | 3 <sup>a</sup> | 0.206 <sup>a</sup>  | 13.592 <sup>a</sup>   | < .001 <sup>a</sup> | 0.045      |
| Residual                         | 13.206              | 873            | 0.015               |                       |                     |            |
| Orientation * CFMT phase         | 1.778 <sup>a</sup>  | 3 <sup>a</sup> | 0.593 <sup>a</sup>  | 58.903 <sup>a</sup>   | < .001 <sup>a</sup> | 0.168      |
| Orientation * CFMT phase * group | 0.373 <sup>a</sup>  | 3 <sup>a</sup> | 0.124 <sup>a</sup>  | 12.348 <sup>a</sup>   | < .001 <sup>a</sup> | 0.041      |
| Residual                         | 8.784               | 873            | 0.010               |                       |                     |            |

Note. Type III Sum of Squares

<sup>a</sup> Mauchly's test of sphericity indicates that the assumption of sphericity is violated ( $p < .05$ ).

### Between Subjects Effects

|          | Sum of Squares | df  | Mean Square | F      | p      | $\eta^2_p$ |
|----------|----------------|-----|-------------|--------|--------|------------|
| group    | 1.976          | 1   | 1.976       | 34.196 | < .001 | 0.105      |
| Residual | 16.816         | 291 | 0.058       |        |        |            |

Note. Type III Sum of Squares

Difference between groups per CFMT level

### Simple Main Effects - group

| Level of CFMT phase | Sum of Squares | df | Mean Square | F      | p      |
|---------------------|----------------|----|-------------|--------|--------|
| 1                   | 0.390          | 1  | 0.390       | 13.049 | < .001 |
| 2                   | 1.567          | 1  | 1.567       | 50.970 | < .001 |
| 3                   | 0.612          | 1  | 0.612       | 19.727 | < .001 |
| 4                   | 0.023          | 1  | 0.023       | 2.025  | 0.156  |

Note. Type III Sum of Squares

## Repeated Measures ANOVA across experiments 1 and 2

### Within Subjects Effects

|                              | Sum of Squares | df  | Mean Square | F       | p      | $\eta^2_p$ |
|------------------------------|----------------|-----|-------------|---------|--------|------------|
| Orientation                  | 20487.906      | 1   | 20487.906   | 692.228 | < .001 | 0.587      |
| Orientation * group          | 2265.301       | 3   | 755.100     | 25.513  | < .001 | 0.136      |
| Orientation * gender         | 54.257         | 1   | 54.257      | 1.833   | 0.176  | 0.004      |
| Orientation * group * gender | 158.431        | 3   | 52.810      | 1.784   | 0.149  | 0.011      |
| Residual                     | 14443.353      | 488 | 29.597      |         |        |            |

Note. Type III Sum of Squares

### Between Subjects Effects

|                | Sum of Squares | df  | Mean Square | F      | p      | $\eta^2_p$ |
|----------------|----------------|-----|-------------|--------|--------|------------|
| group          | 6000.554       | 3   | 2000.185    | 22.294 | < .001 | 0.121      |
| gender         | 2837.666       | 1   | 2837.666    | 31.629 | < .001 | 0.061      |
| group * gender | 867.335        | 3   | 289.112     | 3.222  | 0.022  | 0.019      |
| Residual       | 43782.145      | 488 | 89.718      |        |        |            |

Note. Type III Sum of Squares

Inversion effect per group:

### Simple Main Effects - Orientation

| Level of group | Sum of Squares | df | Mean Square | F       | p      |
|----------------|----------------|----|-------------|---------|--------|
| mask           | 4134.321       | 1  | 4134.321    | 163.812 | < .001 |
| mask study     | 2764.711       | 1  | 2764.711    | 70.514  | < .001 |
| mask test      | 3143.076       | 1  | 3143.076    | 119.977 | < .001 |
| no mask        | 14806.254      | 1  | 14806.254   | 499.893 | < .001 |

Note. Type III Sum of Squares
